# Supplementary material
Source: PubMed Central journal article supplement (PMC6898785)
Supplement: NIHMS1541594-supplement-1.pdf [file NIHMS1541594-supplement-1.pdf]

## A selective BCL-X<sub>L</sub> PROTAC degrader achieves safe and potent antitumor activity

Khan S et al.

| <b>Supplementary Item</b> | <b>Title</b>                                                                                           |
|---------------------------|--------------------------------------------------------------------------------------------------------|
| Supplementary Figure 1    | Analysis of T-ALL PDX cell engraftment by flow cytometry.                                              |
| Supplementary Table 1     | EC <sub>50</sub> values of DT2216 and ABT263 in various tumor cell lines.                              |
| Supplementary Table 2     | Mouse PK data following IV/IP injection and PO Administration with DT2216.                             |
| Supplementary Table 3     | Tissue distribution of DT2216 after i.p. injection in mouse (20 mpk).                                  |
| Supplementary Table 4     | Tumor pharmacokinetics of DT2216 in female CB-17 SCID-beige mice after a single 15 mpk i.p. injection. |
| Supplementary Table 5     | DT2216 sensitizes various cancer cells to chemotherapeutic agents.                                     |
| Supplementary Table 6     | Suppliers for various compounds and enzymes.                                                           |
| Supplementary Table 7     | Antibodies for Western blot and flow cytometric analyses.                                              |
| Supplementary Table 8     | Source parameters for DT2216 and the internal standard (IS).                                           |

## SUPPLEMENTARY FIGURE 1

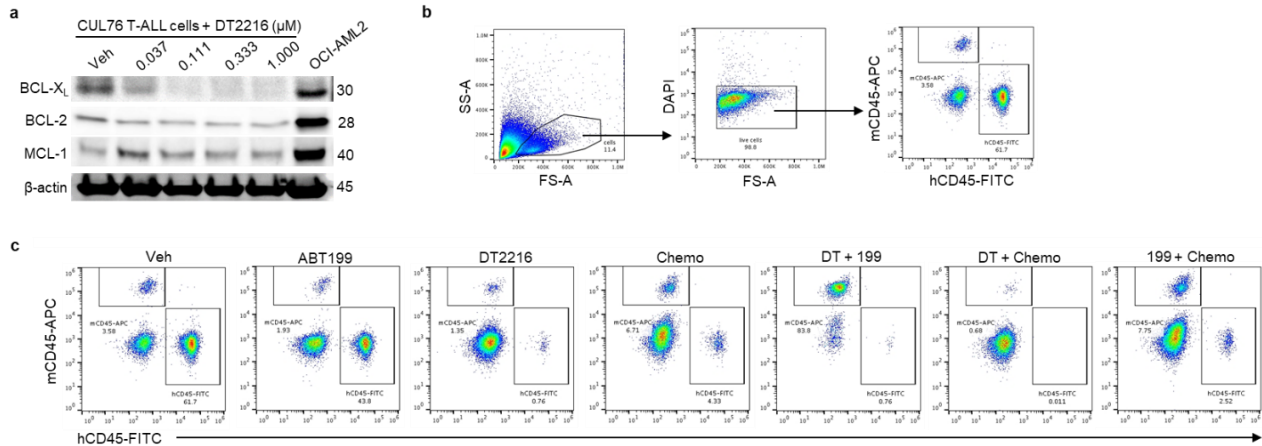

**Supplementary Figure 1. Analysis of T-ALL PDX cell engraftment by flow cytometry. a,** A representative immunoblot analysis shows that DT2216 induced the degradation of BCL-X<sub>L</sub> but not BCL-2 and MCL-1 in a dose-dependent manner in CUL76 PDX T-ALL cells. OCI-AML2 cells were used as control cells for the detection of BCL-X<sub>L</sub>, BCL-2 and MCL-1. Similar results were obtained in one additional independent experiment. **b,** Gating strategy for the flow cytometric analysis of human CD45<sup>+</sup> CUL76 T-ALL cell engraftment. **c,** Flow cytometric analyses of human CD45<sup>+</sup> CUL76 T-ALL cell engraftment in blood from mice 4 weeks after various treatments as shown in Fig. 6f.

**Supplementary Table 1. EC<sub>50</sub> values of DT2216 and ABT263 in various tumor cell lines**

| Tumor Type             | Cell line  | Sensitive to                       |                   |                   | EC <sub>50</sub> (μM)             |        |
|------------------------|------------|------------------------------------|-------------------|-------------------|-----------------------------------|--------|
|                        |            | A-1155463<br>(BCL-X <sub>L</sub> ) | ABT199<br>(BCL-2) | S63845<br>(MCL-1) | ABT263<br>(BCL-2/X <sub>L</sub> ) | DT2216 |
| T-ALL                  | MOLT-4     | ++++                               | -                 | -                 | 0.191                             | 0.052  |
| B-ALL                  | RS4;11     | -                                  | ++++              | -                 | 0.028                             | 0.23   |
| Multiple Myeloma       | EJM        | -                                  | -                 | +                 | >2                                | >2     |
|                        | H929       | -                                  | -                 | ++++              | >2                                | >2     |
| Small cell lung cancer | NCI-H146   | ++++                               | +                 | n.k.              | 0.030                             | 0.160  |
| Breast cancer          | MDA-MB-231 | +                                  | -                 | -                 | 0.707                             | 0.229  |
| Prostate cancer        | PC3        | -                                  | -                 | -                 | >10                               | >10    |
| Hepatic cancer         | HepG2      | -                                  | -                 | -                 | >10                               | >10    |
| Colon cancer           | SW620      | -                                  | -                 | -                 | >10                               | >10    |
| Renal cancer           | 786-0      | n.k.                               | n.k.              | n.k.              | >10                               | >10    |

(++++): Highly sensitive (EC<sub>50</sub> = <0.1 μM); (+): Moderately sensitive (0.1 < EC<sub>50</sub> < 1 μM); (-): Insensitive (EC<sub>50</sub> = >1 μM); n.k.: Not known

**Supplementary Table 2. Mouse PK data following IV/IP injection and PO Administration with DT2216**

| Male C57BL6 mice             | Route of administration    |       |           |
|------------------------------|----------------------------|-------|-----------|
|                              | IP                         | IV    | PO        |
| Formulation                  | 5% DMSO/3% tween 80 in PBS |       |           |
| Dose (mpk)                   | 20                         | 2     | 20        |
| Co/C <sub>max</sub> (ng/mL)  | 51900                      | 54322 | 16.6      |
| T <sub>max</sub> (h)         | 2.0                        | NA    | 4.0       |
| T <sub>1/2</sub> (h)         | 6.3                        | 6.1   | ND        |
| AUC <sub>0-t</sub> (ng.h/mL) | 522484                     | 77302 | 218       |
| T <sub>last</sub> (h)        | 24.0                       | 24.0  | 8.0, 24.0 |
| Cl (mL/min/kg)               | NA                         | 0.42  | NA        |
| V <sub>ss</sub> (L/kg)       | NA                         | 0.102 | NA        |
| F (%)                        | 70.2                       | NA    | 0.028     |

**Supplementary Table 3. Tissue distribution of DT2216 after i.p. injection in mouse (20 mpk)**

| Tissue          | C <sub>max</sub> (ng/mL or ng/g) | T <sub>max</sub> (h) | AUC <sub>last</sub> (ng.hr/mL) | T1/2 (h) | AUC ratio (tissue/plasma) |
|-----------------|----------------------------------|----------------------|--------------------------------|----------|---------------------------|
| Plasma          | 24700                            | 1.0                  | 374852                         | 15       | 1.0                       |
| Liver           | 31126                            | 4.0                  | 737677                         | ND       | 1.97                      |
| Kidney          | 6627                             | 4.0                  | 269685                         | ND       | 0.72                      |
| Brain           | 198                              | 1.0                  | 2505                           | ND       | 0.0067                    |
| Lung            | 1899                             | 4.0                  | 60475                          | ND       | 0.16                      |
| Small intestine | 4848                             | 1.0                  | 116914                         | 17       | 0.31                      |
| Large intestine | 6867                             | 4.0                  | 209973                         | ND       | 0.56                      |
| Heart           | 1640                             | 1.0                  | 28032                          | 15       | 0.72                      |
| Fat             | 12104                            | 4.0                  | 605636                         | ND       | 1.6                       |
| Skin            | 1523                             | 24                   | 78781                          | ND       | 0.21                      |
| Pancreas        | 21607                            | 4.0                  | 1197813                        | ND       | 3.2                       |

T<sub>last</sub> at 96 h for plasma and all of the tissues except the brain (T<sub>last</sub> at 24 h)

**Supplementary Table 4. Tumor pharmacokinetics of DT2216 in female CB-17 SCID-beige mice after a single 15 mpk i.p. injection**

| Parameters           |        |
|----------------------|--------|
| $C_{\max\_T}$ (ng/g) | 1329.8 |
| $T_{\max\_T}$ (h)    | 48.0   |
| Cl/F (g/h/kg)        | 90.4   |
| $K_e$ (1/h)          | 0.011  |
| $t_{1/2}$ (h)        | 64.2   |
| AUC (h* $\mu$ g/g)   | 166.1  |

#Values are presented as mean (n = 2 mice)

*Abbreviations:*  $C_{\max\_T}$  = maximum tumor concentration,  $T_{\max\_T}$  = time to  $C_{\max}$ , Cl/F = clearance,  $K_e$  = elimination rate constant,  $t_{1/2}$  = terminal elimination half-life and AUC= area under the tumor concentration-time curve

**Supplementary Table 5. DT2216 sensitizes various cancer cells to chemotherapeutic agents**

| Cancer type | Cell line        | Combination |             | Average of CI values at EC <sub>75</sub> and EC <sub>90</sub> |                |
|-------------|------------------|-------------|-------------|---------------------------------------------------------------|----------------|
|             |                  | DT2216 +    | ABT263 +    | DT2216 + Chemo                                                | ABT263 + Chemo |
| Breast      | MDA-MB-231       | Docetaxel   | Docetaxel   | 0.142                                                         | 1.38           |
| Breast      | MDA-MB-231       | Doxorubicin | Doxorubicin | 0.151                                                         | 0.199          |
| Breast      | MDA-MB-231       | Vincristine | Vincristine | <0.001                                                        | 0.005          |
| Prostate    | PC-3             | Docetaxel   | Docetaxel   | <0.001                                                        | <0.001         |
| Prostate    | PC-3             | Doxorubicin | Doxorubicin | 0.017                                                         | 0.032          |
| Prostate    | PC-3             | Vincristine | Vincristine | <0.001                                                        | 0.006          |
| Hepatic     | HepG2            | Docetaxel   | Docetaxel   | <0.001                                                        | <0.001         |
| Hepatic     | HepG2            | Doxorubicin | Doxorubicin | <0.3                                                          | 0.178          |
| Hepatic     | HepG2            | Vincristine | Vincristine | 0.001                                                         | 0.001          |
| Colon       | SW620            | Docetaxel   | Docetaxel   | <0.001                                                        | <0.001         |
| Colon       | SW620            | Doxorubicin | Doxorubicin | 0.325                                                         | 0.386          |
| Colon       | SW620            | Vincristine | Vincristine | <0.001                                                        | 0.004          |
| Renal       | 786-O (VHL null) | Docetaxel   | Docetaxel   | 0.454                                                         | 0.003          |

Combination Indices (CI): CI < 0.3 strong synergistic effect; CI < 1.0 synergistic effect; CI = 1.0 additive effect; CI > 1.0 Antagonistic effect

**Supplementary Table 6. Suppliers for various compounds and enzymes**

| <b>Compound name</b>                  | <b>Suppliers</b>                              | <b>Catalog #</b>   |
|---------------------------------------|-----------------------------------------------|--------------------|
| ABT263 (Navitoclax)                   | Selleckchem, Houston, TX, USA                 | S1001              |
| ABT-199 (Venetoclax)                  | Selleckchem, Houston, TX, USA                 | S8048              |
| S63845                                | Selleckchem, Houston, TX, USA                 | S8383              |
| MG132                                 | Selleckchem, Houston, TX, USA                 | S2619              |
| Docetaxel                             | Selleckchem, Houston, TX, USA                 | S1148              |
| Doxorubicin                           | Selleckchem, Houston, TX, USA                 | S1208              |
| Vincristine                           | Selleckchem, Houston, TX, USA                 | S1241              |
| Dexamethasone                         | Selleckchem, Houston, TX, USA                 | S1322              |
| L-Asparaginase                        | KRS Global Biotechnology, Boca Raton, FL, USA | –                  |
| Hexadimethrine bromide<br>(Polybrene) | Sigma-Aldrich, St. Louis, MO, USA             | H9268              |
| Polyethylene glycol 400               | Hampton Research, Aliso Viejo, CA, USA        | HR2-603            |
| Polyethylene glycol 300               | Sigma-Aldrich, St. Louis, MO, USA             | 202371             |
| PHOSAL 50 PG                          | American Lecithin Company, Oxford, CT, USA    | 368315-3130003/020 |
| MIGLYOL® 810 N                        | IOI Oleochemical, Hamburg, Germany            | –                  |
| Polysorbate 80                        | Spectrum Chemical, New Brunswick, NJ, USA     | P0138              |
| Prostaglandin E1 (PGE1)               | Santa Cruz Biotechnology, Dallas, TX, USA     | sc-201223A         |
| Apyrase from potatoes                 | Sigma-Aldrich, St. Louis, MO, USA             | A6410-100UN        |
| DAPI                                  | Thermo Fisher Scientific, Waltham, MA, USA    | D1306              |



**Supplementary Table 7. Antibodies for immunoblotting, immunoprecipitation and flow cytometry**

| Antibody                        | Clone  | Antibody isotype                           | Catalog #   | Concentration |
|---------------------------------|--------|--------------------------------------------|-------------|---------------|
| VHL <sup>1</sup>                | –      | Rabbit IgG Polyclonal                      | 68547S      | 1:1000        |
| BCL-XL <sup>1</sup>             | –      | Rabbit IgG Polyclonal                      | 2762S       | 1:2000        |
| MCL-1 <sup>1</sup>              | D35A5  | Rabbit IgG Monoclonal                      | 5453S       | 1:1000        |
| BCL-2 <sup>1</sup>              | 50E3   | Rabbit IgG Monoclonal                      | 2870S       | 1:500         |
| BCL-W <sup>1</sup>              | 31H4   | Rabbit IgG Monoclonal                      | 2724S       | 1:500         |
| Caspase-3 <sup>1</sup>          | –      | Rabbit IgG Polyclonal                      | 9662S       | 1:1000        |
| Cleaved Caspase-3 <sup>1</sup>  | Asp175 | Rabbit IgG Polyclonal                      | 9661S       | 1:1000        |
| PARP1 <sup>1</sup>              | 46D11  | Rabbit IgG Monoclonal                      | 9532S       | 1:1000        |
| Cleaved PARP1 <sup>1</sup>      | Asp214 | Rabbit IgG Polyclonal                      | 9541S       | 1:1000        |
| BAX <sup>1</sup>                | –      | Rabbit IgG Polyclonal                      | 2772S       | 1:1000        |
| BAK <sup>1</sup>                | D4E4   | Rabbit IgG Monoclonal                      | 12105S      | 1:1000        |
| BIM <sup>1</sup>                | C34C5  | Rabbit IgG Monoclonal                      | 2933S       | 1:1000        |
| PUMA <sup>1</sup>               | D30C10 | Rabbit IgG Monoclonal                      | 12450S      | 1:1000        |
| HA tag <sup>1</sup>             | C29F4  | Rabbit IgG Monoclonal                      | 14031S      | 1:1000        |
| Flag tag <sup>1</sup>           | –      | Rabbit IgG Polyclonal                      | 2044S       | 1:1000        |
| β-actin <sup>1</sup>            | 13E5   | Rabbit IgG Monoclonal                      | 4970L       | 1:5000        |
| β-actin <sup>2</sup>            | C4     | Mouse IgG Monoclonal                       | 8691001     | 1:10000       |
| β-tubulin <sup>1</sup>          | –      | Rabbit IgG Polyclonal                      | 2146S       | 1:5000        |
| BCL-XL <sup>3</sup>             | 7B2.5  | Mouse IgG Monoclonal                       | sc-56021    | –             |
| Normal mouse IgG <sup>3</sup>   | –      | –                                          | sc-2025     | –             |
| Secondary antibody <sup>1</sup> |        | Anti-rabbit IgG, HRP                       | 7074S       | 1:3000        |
| Secondary antibody <sup>1</sup> |        | Anti-mouse IgG, HRP                        | 7076S       | 1:3000        |
| Secondary antibody <sup>4</sup> |        | Anti-Rabbit IgG, Fc fragment specific, HRP | 111-035-046 | 1:10000       |
| mCD45-APC <sup>5</sup>          | 30-F11 | Rat IgG2b, κ, APC                          | 103111      | 1:250         |
| hCD45-FITC <sup>5</sup>         | H130   | Mouse IgG1, κ, FITC                        | 304038      | 1:250         |

**Footnotes:** <sup>1</sup>Cell Signaling Technology, Danvers, MA, USA; <sup>2</sup>MP Biomedicals, Santa Ana, CA, USA; <sup>3</sup>Santa Cruz Biotechnology, Dallas, TX, USA; <sup>4</sup>Jackson ImmunoResearch Inc., West Grove, PA, USA; and <sup>5</sup>Biolegend, San Diego, CA, USA

**Supplementary Table 8. Source parameters for DT2216 and the internal standard (IS)**

| S. No. | Analyte         | Mass transition (m/z) | Cone voltage (V) | Collision energy (V) |
|--------|-----------------|-----------------------|------------------|----------------------|
| 1      | DT2216          | 771.57 > 202.14       | 50               | 42                   |
| 2      | Amiodarone (IS) | 645.92 > 201.12       | 90               | 34                   |
